# Supplementary material for: Reproductive competition triggers mass eviction in cooperative banded mongooses
Source: PubMed Central journal article supplement (PMC4810850; doi:10.1098/rspb.2015.2607), 2016-03-16
Supplement: rspb20152607supp1.pdf [file rspb20152607supp1.pdf]

1 **Electronic Supplementary Material**

2

3 **Controlling for regression to the mean**

4 To account for potential problems with regression to the mean, we calculated  $\Delta C_S$ ,  $\Delta C_E$  and  $\Delta H$  as an adjusted change using the formulae from Kelly & Price  
5 (2005):

$$\Delta X = (X_2 - \bar{X}_2) - \hat{p}(X_1 - \bar{X}_1)$$

6 and

$$\hat{p} = \frac{2rs_1s_2}{s_1^2 + s_2^2}$$

7 where  $X_1$  and  $s_1$  are the observation and standard deviation of the observation in the breeding attempt before eviction, and  $X_2$  and  $s_2$  are the observation  
8 and standard deviation of the observation in the breeding attempt of the eviction, and  $r$  is the correlation between the observations in the two consecutive  
9 breeding attempts.

10

- 11 ESM Table 1: 'Female evictions'. Model performance in predicting the probability of an eviction event occurring during a breeding attempt ( $N=415$  breeding  
 12 attempts in 15 groups). Analysis using the female reproductive success ( $C_5$ ) measure of helping performance under the coercion of cooperation hypothesis.  
 13 Models above the line comprise the top model set where  $\Delta AIC \leq 6$ .

| Hyp. | Int.  | $C_5$ | $H$  | $C_5:H$ | $R$    | $E$  | $\Delta C_5$ | $\Delta H$ | $\Delta C_5:\Delta H$ | $B$  | $B:E$ | $R:E$ | $G$  | $R:G$ | $R:B$ | $k$ | logLik  | AIC    | $\Delta AIC$ | $w_i$ | Retained | Adj. $w_i$ |
|------|-------|-------|------|---------|--------|------|--------------|------------|-----------------------|------|-------|-------|------|-------|-------|-----|---------|--------|--------------|-------|----------|------------|
| R    | -5.44 |       |      |         |        |      |              |            |                       | 0.37 |       |       |      |       |       | 3   | -108.63 | 223.26 | 0.00         | 0.34  | ✓        | 1.00       |
| A    | -3.34 |       |      |         | -14.46 |      |              |            |                       | 0.11 |       |       |      |       | 1.76  | 5   | -107.25 | 224.50 | 1.24         | 0.18  |          |            |
| A/R  | -5.49 |       |      |         | 0.42   |      |              |            |                       | 0.37 |       |       |      |       |       | 4   | -108.62 | 225.25 | 1.99         | 0.13  |          |            |
| R    | -5.45 |       |      |         |        | 0.00 |              |            |                       | 0.37 |       |       |      |       |       | 4   | -108.63 | 225.26 | 2.00         | 0.13  |          |            |
| A    | -3.29 |       |      |         | -14.52 | 0.00 |              |            |                       | 0.11 |       |       |      |       | 1.77  | 6   | -107.25 | 226.50 | 3.24         | 0.07  |          |            |
| A/R  | -5.51 |       |      |         | 0.43   | 0.00 |              |            |                       | 0.37 |       |       |      |       |       | 5   | -108.62 | 227.24 | 3.99         | 0.05  |          |            |
| R    | -5.37 |       |      |         |        | 0.00 |              |            |                       | 0.36 | 0.00  |       |      |       |       | 5   | -108.63 | 227.26 | 4.00         | 0.05  |          |            |
| A    | -3.34 |       |      |         | -14.11 | 0.00 |              |            |                       | 0.11 |       | -0.01 |      |       | 1.77  | 7   | -107.25 | 228.49 | 5.23         | 0.02  |          |            |
| A    | -5.25 |       |      |         | -1.44  | 0.00 |              |            |                       | 0.37 |       | 0.03  |      |       |       | 6   | -108.60 | 229.21 | 5.95         | 0.02  |          |            |
| R    | -5.42 |       |      |         | 0.44   | 0.00 |              |            |                       | 0.36 | 0.00  |       |      |       |       | 6   | -108.62 | 229.24 | 5.98         | 0.02  |          |            |
| C    | -4.99 | 0.47  | 0.40 | -0.07   |        |      |              |            |                       |      |       |       |      |       |       | 5   | -111.65 | 233.30 | 10.04        | 0.00  |          |            |
| C    | -5.07 | 0.47  | 0.40 | -0.07   | 0.57   |      |              |            |                       |      |       |       |      |       |       | 6   | -111.63 | 235.27 | 12.01        | 0.00  |          |            |
| C    | -4.97 | 0.47  | 0.40 | -0.07   |        | 0.00 |              |            |                       |      |       |       |      |       |       | 6   | -111.65 | 235.30 | 12.04        | 0.00  |          |            |
| C    | -5.05 | 0.46  | 0.40 | -0.07   | 0.57   | 0.00 |              |            |                       |      |       |       |      |       |       | 7   | -111.63 | 237.27 | 14.01        | 0.00  |          |            |
| A    | -2.75 |       |      |         | -11.13 |      |              |            |                       |      |       |       | 0.01 | 0.56  |       | 5   | -115.16 | 240.31 | 17.05        | 0.00  |          |            |
| A    | -4.32 |       |      |         | 1.65   |      |              |            |                       |      |       |       | 0.07 |       |       | 4   | -116.75 | 241.50 | 18.24        | 0.00  |          |            |
| A    | -2.98 |       |      |         | -10.94 | 0.00 |              |            |                       |      |       |       | 0.01 | 0.56  |       | 6   | -115.10 | 242.21 | 18.95        | 0.00  |          |            |
| A    | -4.60 |       |      |         | 1.76   | 0.00 |              |            |                       |      |       |       | 0.07 |       |       | 5   | -116.66 | 243.33 | 20.07        | 0.00  |          |            |
| A    | -2.65 |       |      |         | -13.35 | 0.00 |              |            |                       |      |       | 0.04  | 0.01 | 0.56  |       | 7   | -115.07 | 244.14 | 20.88        | 0.00  |          |            |
| A    | -4.19 |       |      |         | -1.11  | 0.00 |              |            |                       |      |       | 0.05  | 0.07 |       |       | 6   | -116.62 | 245.25 | 21.99        | 0.00  |          |            |
| C    | -2.86 |       |      |         |        |      | 0.37         | 0.11       | 0.01                  |      |       |       |      |       |       | 5   | -118.19 | 246.37 | 23.11        | 0.00  |          |            |
| Null | -2.87 |       |      |         |        |      |              |            |                       |      |       |       |      |       |       | 2   | -121.28 | 246.57 | 23.31        | 0.00  |          |            |
| C    | -3.37 |       |      |         |        | 0.01 | 0.38         | 0.11       | 0.01                  |      |       |       |      |       |       | 6   | -117.86 | 247.71 | 24.45        | 0.00  |          |            |
| C    | -3.19 |       |      |         | 2.03   |      | 0.38         | 0.11       | 0.01                  |      |       |       |      |       |       | 6   | -117.98 | 247.96 | 24.70        | 0.00  |          |            |
| Any  | -3.15 |       |      |         | 1.69   |      |              |            |                       |      |       |       |      |       |       | 3   | -121.14 | 248.28 | 25.02        | 0.00  |          |            |
| C    | -3.80 |       |      |         | 2.32   | 0.01 | 0.39         | 0.11       | 0.01                  |      |       |       |      |       |       | 7   | -117.59 | 249.19 | 25.93        | 0.00  |          |            |
| Any  | -3.62 |       |      |         | 1.93   | 0.01 |              |            |                       |      |       |       |      |       |       | 4   | -120.90 | 249.81 | 26.55        | 0.00  |          |            |
| A    | -3.00 |       |      |         | -2.86  | 0.00 |              |            |                       |      |       | 0.08  |      |       |       | 5   | -120.79 | 251.57 | 28.31        | 0.00  |          |            |

- 14 Hyp. = Hypothesis: A = Adaptive Forced Dispersal; C = Coercion of Cooperation; R = Reproductive Competition; Any = Any of the three hypotheses; Null = null model. Columns 2 to 16 show  
 15 parameter effect sizes from GLMMs on the logit scale: Int. = Intercept;  $C_5$  = number of emergent pups per female that contributed to the previous litter;  $H$  = number of female helpers in the

16 previous breeding attempt;  $R$  = mean group relatedness;  $E$  = mean rainfall in previous 6 months;  $\Delta C_5$  = change in the number of emergent pups per female that contributed to the litter in the  
17 breeding attempts before and of the eviction;  $\Delta H$  = change in the number of female helpers in the breeding attempts before and of the eviction;  $B$  = number of breeding females;  $G$  = group  
18 size;  $:$  = interaction.  $k$  = number of estimated parameters including a random intercept for group ID; logLik = log-likelihood; AIC = Akaike's information criterion;  $\Delta AIC$  = change in AIC value  
19 from the best performing model;  $w_i$  = Akaike's model weight; Retained = tick indicates that the model was retained after applying the nesting rule of Richards et al. (2011); Adj.  $w_i$  = adjusted  
20 Akaike's model weight for the retained models. Blank cells indicate that the term was absent from that model.

- 21 ESM Table 2: 'Female evictions'. Model performance in predicting the probability of an eviction event occurring during a breeding attempt ( $N=270$  breeding attempts in 14 groups). Analysis using the helping effort ( $C_E$ ) measure of helping performance under the coercion of cooperation hypothesis. Models above the line comprise the top model set where  $\Delta AICc \leq 6$ .

| Hyp. | Int.  | $C_E$ | $H$  | $C_E:H$ | $R$   | $E$   | $\Delta C_E$ | $\Delta H$ | $\Delta C_E:\Delta H$ | $B$   | $B:E$ | $R:E$ | $G$  | $R:G$ | $R:B$ | $k$ | logLik | AICc   | $\Delta AICc$ | $w_i$ | Retained | Adj. $w_i$ |
|------|-------|-------|------|---------|-------|-------|--------------|------------|-----------------------|-------|-------|-------|------|-------|-------|-----|--------|--------|---------------|-------|----------|------------|
| R    | 1.28  |       |      |         |       | -0.11 |              |            |                       | -0.67 | 0.02  |       |      |       |       | 5   | -62.26 | 134.76 | 0.00          | 0.27  | ✓        | 0.49       |
| R    | 1.66  |       |      |         | -3.95 | -0.11 |              |            |                       | -0.62 | 0.02  |       |      |       |       | 6   | -61.82 | 135.96 | 1.20          | 0.15  |          |            |
| R    | -7.65 |       |      |         |       | 0.03  |              |            |                       | 0.43  |       |       |      |       |       | 4   | -64.04 | 136.22 | 1.47          | 0.13  | ✓        | 0.24       |
| R    | -5.73 |       |      |         |       |       |              |            |                       | 0.44  |       |       |      |       |       | 3   | -65.16 | 136.41 | 1.65          | 0.12  | ✓        | 0.22       |
| A/R  | -6.95 |       |      |         | -4.25 | 0.03  |              |            |                       | 0.45  |       |       |      |       |       | 5   | -63.50 | 137.23 | 2.48          | 0.08  |          |            |
| A/R  | -5.10 |       |      |         | -4.46 |       |              |            |                       | 0.46  |       |       |      |       |       | 4   | -64.55 | 137.24 | 2.49          | 0.08  |          |            |
| A    | -6.67 |       |      |         | 4.71  |       |              |            |                       | 0.66  |       |       |      |       | -1.13 | 5   | -64.36 | 138.95 | 4.20          | 0.03  |          |            |
| A    | -8.49 |       |      |         | 4.67  | 0.03  |              |            |                       | 0.64  |       |       |      |       | -1.10 | 6   | -63.33 | 138.99 | 4.23          | 0.03  |          |            |
| A    | -8.18 |       |      |         | 3.23  | 0.05  |              |            |                       | 0.45  |       | -0.12 |      |       |       | 6   | -63.43 | 139.17 | 4.42          | 0.03  |          |            |
| C    | -5.30 | -5.16 | 0.17 | 0.79    |       | 0.03  |              |            |                       |       |       |       |      |       |       | 6   | -64.13 | 140.58 | 5.83          | 0.01  | ✓        | 0.03       |
| C    | -3.44 | -5.13 | 0.18 | 0.79    |       |       |              |            |                       |       |       |       |      |       |       | 5   | -65.18 | 140.60 | 5.84          | 0.01  | ✓        | 0.02       |
| A    | -9.65 |       |      |         | 11.65 | 0.05  |              |            |                       | 0.64  |       | -0.11 |      |       | -1.07 | 7   | -63.27 | 140.96 | 6.21          | 0.01  |          |            |
| C    | -3.02 | -5.04 | 0.18 | 0.79    | -2.66 |       |              |            |                       |       |       |       |      |       |       | 6   | -64.95 | 142.21 | 7.46          | 0.01  |          |            |
| C    | -4.86 | -5.11 | 0.17 | 0.79    | -2.45 | 0.03  |              |            |                       |       |       |       |      |       |       | 7   | -63.94 | 142.30 | 7.55          | 0.01  |          |            |
| A    | -4.97 |       |      |         | -1.57 |       |              |            |                       |       |       |       | 0.13 |       |       | 4   | -67.35 | 142.85 | 8.10          | 0.00  |          |            |
| A    | -6.56 |       |      |         | -1.51 | 0.03  |              |            |                       |       |       |       | 0.13 |       |       | 5   | -66.51 | 143.24 | 8.48          | 0.00  |          |            |
| A    | -4.45 |       |      |         | -4.97 |       |              |            |                       |       |       |       | 0.11 | 0.15  |       | 5   | -67.33 | 144.88 | 10.12         | 0.00  |          |            |
| A    | -7.75 |       |      |         | 5.59  | 0.05  |              |            |                       |       | -0.11 | 0.12  |      |       |       | 6   | -66.44 | 145.20 | 10.44         | 0.00  |          |            |
| A    | -5.84 |       |      |         | -6.40 | 0.03  |              |            |                       |       |       |       | 0.09 | 0.22  |       | 6   | -66.45 | 145.22 | 10.47         | 0.00  |          |            |
| A    | -7.02 |       |      |         | 0.63  | 0.05  |              |            |                       |       | -0.12 | 0.09  | 0.24 |       |       | 7   | -66.37 | 147.18 | 12.42         | 0.00  |          |            |
| Null | -2.61 |       |      |         |       |       |              |            |                       |       |       |       |      |       |       | 2   | -75.89 | 155.83 | 21.07         | 0.00  |          |            |
| Any  | -5.13 |       |      |         | -0.03 | 0.04  |              |            |                       |       |       |       |      |       |       | 4   | -74.03 | 156.21 | 21.46         | 0.00  |          |            |
| C    | -5.09 |       |      |         |       | 0.04  | 0.26         | -0.54      | 0.19                  |       |       |       |      |       |       | 6   | -72.56 | 157.45 | 22.69         | 0.00  |          |            |
| Any  | -2.63 |       |      |         | 0.15  |       |              |            |                       |       |       |       |      |       |       | 3   | -75.89 | 157.87 | 23.12         | 0.00  |          |            |
| A    | -6.61 |       |      |         | 9.04  | 0.06  |              |            |                       |       |       | -0.14 |      |       |       | 5   | -73.91 | 158.05 | 23.30         | 0.00  |          |            |
| C    | -2.58 |       |      |         |       |       | 0.25         | -0.49      | 0.11                  |       |       |       |      |       |       | 5   | -74.37 | 158.98 | 24.22         | 0.00  |          |            |
| C    | -5.04 |       |      |         | -0.23 | 0.04  | 0.26         | -0.53      | 0.19                  |       |       |       |      |       |       | 7   | -72.56 | 159.55 | 24.80         | 0.00  |          |            |
| C    | -2.53 |       |      |         | -0.24 |       | 0.25         | -0.49      | 0.11                  |       |       |       |      |       |       | 6   | -74.37 | 161.07 | 26.31         | 0.00  |          |            |

- 24 Hyp. = Hypothesis: A = Adaptive Forced Dispersal; C = Coercion of Cooperation; R = Reproductive Competition; Any = Any of the three hypotheses; Null = null model. Columns 2 to 16 show parameter effect sizes from GLMMs on the logit scale: Int. = Intercept;  $C_E$  = number of female helpers left per day of babysitting of the previous litter;  $H$  = number of female helpers in the
- 25

26 previous breeding attempt;  $R$  = mean group relatedness;  $E$  = mean rainfall in previous 6 months;  $\Delta C_E$  = change in the number of female helpers left per day of babysitting in the breeding  
27 attempts before and of the eviction;  $\Delta H$  = change in the number of female helpers in the breeding attempts before and of the eviction;  $B$  = number of breeding females;  $G$  = group size;  $:$  =  
28 interaction.  $k$  = number of estimated parameters including a random intercept for group ID; logLik = log-likelihood; AICc = corrected Akaike's information criterion;  $\Delta$ AICc = change in AICc  
29 value from the best performing model;  $w_i$  = Akaike's model weight; Retained = tick indicates that the model was retained after applying the nesting rule of Richards et al. (2011); Adj.  $w_i$  =  
30 adjusted Akaike's model weight for the retained models. Blank cells indicate that the term was absent from that model.

- 31 ESMT Table 3: 'Male evictions'. Model performance in predicting the probability that males are evicted alongside females when an eviction event occurs
- 32 ( $N=37$  eviction events in 7 groups). Analysis using the female reproductive success ( $C_S$ ) measure of helping performance under the coercion of cooperation
- 33 hypothesis. Models above the line comprise the top model set where  $\Delta AICc \leq 6$ .

| Hyp. | Int.  | $C_S$ | $H$  | $C_S:H$ | $R$    | $E$   | $\Delta C_S$ | $\Delta H$ | $\Delta C_S:\Delta H$ | $B$   | $B:E$ | $R:E$ | $G$  | $R:G$ | $R:B$ | $k$ | logLik | AICc  | $\Delta AICc$ | $w_i$ | Retained | Adj. $w_i$ |
|------|-------|-------|------|---------|--------|-------|--------------|------------|-----------------------|-------|-------|-------|------|-------|-------|-----|--------|-------|---------------|-------|----------|------------|
| R    | -2.28 |       |      |         |        |       |              |            |                       | 0.38  |       |       |      |       |       | 3   | -20.42 | 47.57 | 0.00          | 0.47  | ✓        | 0.95       |
| R    | -1.81 |       |      |         |        | -0.01 |              |            |                       | 0.39  |       |       |      |       |       | 4   | -20.32 | 49.88 | 2.32          | 0.15  |          |            |
| A/R  | -2.16 |       |      |         | -0.68  |       |              |            |                       | 0.38  |       |       |      |       |       | 4   | -20.41 | 50.07 | 2.51          | 0.13  |          |            |
| R    | -0.30 |       |      |         |        | -0.04 |              |            |                       | -0.10 | 0.01  |       |      |       |       | 5   | -19.78 | 51.51 | 3.94          | 0.07  |          |            |
| A    | -0.94 |       |      |         | -9.71  |       |              |            |                       | 0.11  |       |       |      |       | 2.02  | 5   | -20.24 | 52.41 | 4.85          | 0.04  |          |            |
| A/R  | -1.64 |       |      |         | -0.90  | -0.01 |              |            |                       | 0.39  |       |       |      |       |       | 5   | -20.31 | 52.55 | 4.98          | 0.04  |          |            |
| A    | -3.82 |       |      |         | -1.58  |       |              |            |                       |       |       |       | 0.15 |       |       | 4   | -22.08 | 53.41 | 5.84          | 0.03  | ✓        | 0.05       |
| Null | -0.38 |       |      |         |        |       |              |            |                       |       |       |       |      |       |       | 2   | -24.98 | 54.31 | 6.75          | 0.02  |          |            |
| R    | -0.25 |       |      |         | -0.35  | -0.04 |              |            |                       | -0.10 | 0.01  |       |      |       |       | 6   | -19.78 | 54.37 | 6.80          | 0.02  |          |            |
| A    | -0.21 |       |      |         | -10.96 | -0.01 |              |            |                       | 0.09  |       |       |      |       | 2.25  | 6   | -20.10 | 55.00 | 7.44          | 0.01  |          |            |
| A    | -1.35 |       |      |         | -3.19  | -0.01 |              |            |                       | 0.39  |       | 0.03  |      |       |       | 6   | -20.30 | 55.40 | 7.84          | 0.01  |          |            |
| A    | -3.45 |       |      |         | -1.54  | -0.01 |              |            |                       |       |       |       | 0.16 |       |       | 5   | -21.90 | 55.74 | 8.18          | 0.01  |          |            |
| A    | -6.12 |       |      |         | 14.14  |       |              |            |                       |       |       |       | 0.25 | -0.70 |       | 5   | -21.95 | 55.84 | 8.27          | 0.01  |          |            |
| Any  | 0.09  |       |      |         | -2.97  |       |              |            |                       |       |       |       |      |       |       | 3   | -24.83 | 56.38 | 8.82          | 0.01  |          |            |
| A    | 0.11  |       |      |         | -13.50 | -0.01 |              |            |                       | 0.08  |       | 0.04  |      |       | 2.26  | 7   | -20.10 | 58.05 | 10.49         | 0.00  |          |            |
| A    | -5.84 |       |      |         | 14.56  | -0.01 |              |            |                       |       |       |       | 0.26 | -0.71 |       | 6   | -21.78 | 58.36 | 10.80         | 0.00  |          |            |
| A    | -2.14 |       |      |         | -11.17 | -0.03 |              |            |                       |       |       | 0.14  | 0.16 |       |       | 6   | -21.85 | 58.49 | 10.93         | 0.00  |          |            |
| Any  | 0.18  |       |      |         | -3.00  | 0.00  |              |            |                       |       |       |       |      |       |       | 4   | -24.82 | 58.90 | 11.33         | 0.00  |          |            |
| C    | -1.61 | 0.38  | 0.11 | -0.02   |        |       |              |            |                       |       |       |       |      |       |       | 5   | -24.15 | 60.24 | 12.68         | 0.00  |          |            |
| C    | -0.53 |       |      |         |        |       | 0.35         | 0.01       | -0.05                 |       |       |       |      |       |       | 5   | -24.21 | 60.35 | 12.78         | 0.00  |          |            |
| A    | 2.51  |       |      |         | -22.06 | -0.03 |              |            |                       |       |       | 0.28  |      |       |       | 5   | -24.48 | 60.90 | 13.34         | 0.00  |          |            |
| A    | -4.48 |       |      |         | 4.69   | -0.03 |              |            |                       |       |       | 0.16  | 0.27 | -0.76 |       | 7   | -21.71 | 61.28 | 13.72         | 0.00  |          |            |
| C    | -1.25 | 0.37  | 0.12 | -0.02   | -2.29  |       |              |            |                       |       |       |       |      |       |       | 6   | -24.07 | 62.95 | 15.38         | 0.00  |          |            |
| C    | -1.47 | 0.38  | 0.11 | -0.02   |        | 0.00  |              |            |                       |       |       |       |      |       |       | 6   | -24.14 | 63.09 | 15.52         | 0.00  |          |            |
| C    | -0.25 |       |      |         | -1.74  |       | 0.33         | 0.02       | -0.05                 |       |       |       |      |       |       | 6   | -24.16 | 63.12 | 15.55         | 0.00  |          |            |
| C    | -0.81 |       |      |         |        | 0.00  | 0.37         | 0.01       | -0.05                 |       |       |       |      |       |       | 6   | -24.17 | 63.14 | 15.57         | 0.00  |          |            |
| C    | -1.10 | 0.37  | 0.12 | -0.02   | -2.33  | 0.00  |              |            |                       |       |       |       |      |       |       | 7   | -24.06 | 65.98 | 18.42         | 0.00  |          |            |
| C    | -0.52 |       |      |         | -1.55  | 0.00  | 0.35         | 0.01       | -0.05                 |       |       |       |      |       |       | 7   | -24.13 | 66.12 | 18.56         | 0.00  |          |            |

- 34 Hyp. = Hypothesis: A = Adaptive Forced Dispersal; C = Coercion of Cooperation; R = Reproductive Competition; Any = Any of the three hypotheses; Null = null model. Columns 2 to 16 show
- 35 parameter effect sizes from GLMMs on the logit scale: Int. = Intercept;  $C_S$  = number of emergent pups per female that contributed to the previous litter;  $H$  = number of male helpers in the

36 previous breeding attempt;  $R$  = mean group relatedness;  $E$  = mean rainfall in previous 6 months;  $\Delta C_5$  = change in the number of emergent pups per female that contributed to the litter in the  
37 breeding attempts before and of the eviction;  $\Delta H$  = change in the number of male helpers in the breeding attempts before and of the eviction;  $B$  = number of breeding males;  $G$  = group size; :  
38 = interaction.  $k$  = number of estimated parameters including a random intercept for group ID; logLik = log-likelihood; AICc = corrected Akaike's information criterion;  $\Delta AICc$  = change in AICc  
39 value from the best performing model;  $w_i$  = Akaike's model weight; Retained = tick indicates that the model was retained after applying the nesting rule of Richards et al. (2011); Adj.  $w_i$  =  
40 adjusted Akaike's model weight for the retained models. Blank cells indicate that the term was absent from that model.

- 41 ESM Table 4: 'Male evictions'. Model performance in predicting the probability that males are evicted alongside females when an eviction event occurs
- 42 ( $N=22$  eviction events in 6 groups). Analysis using the helping effort ( $C_E$ ) measure of helping performance under the coercion of cooperation hypothesis.
- 43 Models above the line comprise the top model set where  $\Delta AICc \leq 6$ .

| Hyp. | Int.  | $C_E$ | $H$  | $C_E:H$ | $R$   | $E$   | $\Delta C_E$ | $\Delta H$ | $\Delta C_E:\Delta H$ | $B$   | $B:E$ | $R:E$ | $G$   | $R:G$ | $R:B$ | $k$ | logLik | AICc  | $\Delta AICc$ | $w_i$ | Retained | Adj. $w_i$ |
|------|-------|-------|------|---------|-------|-------|--------------|------------|-----------------------|-------|-------|-------|-------|-------|-------|-----|--------|-------|---------------|-------|----------|------------|
| Null | 0.18  |       |      |         |       |       |              |            |                       |       |       |       |       |       |       | 2   | -15.16 | 34.95 | 0.00          | 0.31  | ✓        | 1.00       |
| R    | -1.00 |       |      |         |       |       |              |            |                       | 0.24  |       |       |       |       |       | 3   | -14.24 | 35.80 | 0.86          | 0.20  |          |            |
| A    | -3.25 |       |      |         | 1.65  |       |              |            |                       |       |       |       | 0.13  |       |       | 4   | -13.56 | 37.47 | 2.52          | 0.09  |          |            |
| Any  | 0.06  |       |      |         | 0.70  |       |              |            |                       |       |       |       |       |       |       | 3   | -15.15 | 37.64 | 2.69          | 0.08  |          |            |
| R    | -2.36 |       |      |         |       | 0.02  |              |            |                       | 0.22  |       |       |       |       |       | 4   | -14.07 | 38.50 | 3.55          | 0.05  |          |            |
| R    | 8.86  |       |      |         |       | -0.16 |              |            |                       | -2.33 | 0.04  |       |       |       |       | 5   | -12.42 | 38.59 | 3.65          | 0.05  |          |            |
| A/R  | -1.28 |       |      |         | 1.53  |       |              |            |                       | 0.24  |       |       |       |       |       | 4   | -14.21 | 38.77 | 3.82          | 0.05  |          |            |
| C    | -0.07 |       |      |         |       |       | -0.11        | 0.52       | 0.53                  |       |       |       |       |       |       | 5   | -12.83 | 39.41 | 4.46          | 0.03  |          |            |
| Any  | -1.98 |       |      |         | 1.23  | 0.03  |              |            |                       |       |       |       |       |       |       | 4   | -14.83 | 40.01 | 5.06          | 0.02  |          |            |
| A    | -1.86 |       |      |         | -8.18 |       |              |            |                       |       |       |       | 0.06  | 0.46  |       | 5   | -13.50 | 40.75 | 5.81          | 0.02  |          |            |
| A    | -2.66 |       |      |         | 1.49  | -0.02 |              |            |                       |       |       |       | 0.14  |       |       | 5   | -13.50 | 40.76 | 5.81          | 0.02  |          |            |
| C    | -2.04 | 0.46  | 0.27 | -0.07   |       |       |              |            |                       |       |       |       |       |       |       | 5   | -13.92 | 41.59 | 6.65          | 0.01  |          |            |
| A/R  | -2.75 |       |      |         | 1.86  | 0.02  |              |            |                       | 0.23  |       |       |       |       |       | 5   | -14.03 | 41.82 | 6.87          | 0.01  |          |            |
| A    | -0.63 |       |      |         | -2.63 |       |              |            |                       | 0.08  |       |       |       |       | 1.02  | 5   | -14.18 | 42.11 | 7.16          | 0.01  |          |            |
| R    | 8.82  |       |      |         | 3.88  | -0.17 |              |            |                       | -2.40 | 0.04  |       |       |       |       | 6   | -12.28 | 42.16 | 7.21          | 0.01  |          |            |
| A    | -7.27 |       |      |         | 36.23 | 0.11  |              |            |                       |       |       | -0.55 |       |       |       | 5   | -14.51 | 42.77 | 7.82          | 0.01  |          |            |
| C    | 1.11  |       |      |         |       | -0.02 | -0.21        | 0.58       | 0.66                  |       |       |       |       |       |       | 6   | -12.77 | 43.13 | 8.18          | 0.01  |          |            |
| C    | -0.35 |       |      |         | 1.53  |       | -0.10        | 0.52       | 0.53                  |       |       |       |       |       |       | 6   | -12.81 | 43.21 | 8.27          | 0.01  |          |            |
| A    | -6.95 |       |      |         | 31.77 | 0.05  |              |            |                       |       |       | -0.47 | 0.15  |       |       | 6   | -13.27 | 44.14 | 9.19          | 0.00  |          |            |
| A    | -1.68 |       |      |         | -6.27 | -0.01 |              |            |                       |       |       |       | 0.09  | 0.36  |       | 6   | -13.47 | 44.55 | 9.60          | 0.00  |          |            |
| A    | -7.38 |       |      |         | 32.88 | 0.10  |              |            |                       | 0.22  |       | -0.48 |       |       |       | 6   | -13.79 | 45.18 | 10.23         | 0.00  |          |            |
| C    | -2.74 | 0.46  | 0.25 | -0.07   |       | 0.01  |              |            |                       |       |       |       |       |       |       | 6   | -13.87 | 45.34 | 10.40         | 0.00  |          |            |
| C    | -1.87 | 0.50  | 0.28 | -0.08   | -1.25 |       |              |            |                       |       |       |       |       |       |       | 6   | -13.91 | 45.41 | 10.47         | 0.00  |          |            |
| A    | -1.84 |       |      |         | -5.55 | 0.03  |              |            |                       | -0.06 |       |       |       |       | 1.83  | 6   | -13.96 | 45.51 | 10.56         | 0.00  |          |            |
| C    | 0.83  |       |      |         | 1.48  | -0.02 | -0.20        | 0.58       | 0.66                  |       |       |       |       |       |       | 7   | -12.74 | 47.49 | 12.54         | 0.00  |          |            |
| A    | -7.32 |       |      |         | 33.14 | 0.13  |              |            |                       |       |       | -0.98 | -0.08 | 1.48  |       | 7   | -12.93 | 47.85 | 12.91         | 0.00  |          |            |
| A    | -7.20 |       |      |         | 30.57 | 0.12  |              |            |                       | -0.26 |       | -0.63 |       |       | 2.97  | 7   | -13.59 | 49.18 | 14.23         | 0.00  |          |            |
| C    | -2.58 | 0.49  | 0.26 | -0.08   | -1.02 | 0.01  |              |            |                       |       |       |       |       |       |       | 7   | -13.86 | 49.72 | 14.78         | 0.00  |          |            |

44 Hyp. = Hypothesis: A = Adaptive Forced Dispersal; C = Coercion of Cooperation; R = Reproductive Competition; Any = Any of the three hypotheses; Null = null model. Columns 2 to 16 show

45 parameter effect sizes from GLMMs on the logit scale: Int. = Intercept;  $C_E$  = number of male helpers left per day of babysitting of the previous litter;  $H$  = number of male helpers in the



46 previous breeding attempt;  $R$  = mean group relatedness;  $E$  = mean rainfall in previous 6 months;  $\Delta C_E$  = change in the number of male helpers left per day of babysitting in the breeding  
47 attempts before and of the eviction;  $\Delta H$  = change in the number of male helpers in the breeding attempts before and of the eviction;  $B$  = number of breeding males;  $G$  = group size;  $:$  =  
48 interaction.  $k$  = number of estimated parameters including a random intercept for group ID; logLik = log-likelihood; AICc = corrected Akaike's information criterion;  $\Delta$ AICc = change in AICc  
49 value from the best performing model;  $w_i$  = Akaike's model weight; Retained = tick indicates that the model was retained after applying the nesting rule of Richards et al. (2011); Adj.  $w_i$  =  
50 adjusted Akaike's model weight for the retained models. Blank cells indicate that the term was absent from that model.

51 ESM Table 5: ‘Temporary evictions’. Model performance in predicting the probability that evictees are allowed to return to their group following an eviction  
 52 event ( $N=37$  eviction events in 7 groups). Analysis using the female reproductive success ( $C_S$ ) measure of helping performance under the coercion of  
 53 cooperation hypothesis. Models above the line comprise the top model set where  $\Delta AICc \leq 6$ .

| Hyp. | Int. | $C_S$ | $H_F$ | $H_M$ | $C_S:H_F$ | $C_S:H_M$ | $R$  | $E$ | $\Delta C_S$ | $\Delta H_F$ | $\Delta H_M$ | $\frac{\Delta C_S}{\Delta H_F}$ | $\frac{\Delta C_S}{\Delta H_M}$ | $B_F$ | $B_M$ | $B_F:E$ | $B_M:E$ | $R:E$ | $G$  | $R:G$ | $R:B_F$ | $R:B_M$ | $k$ | logLik | AICc | $\Delta AICc$ | $w_i$ | Ret. | Adj.<br>$w_i$ |
|------|------|-------|-------|-------|-----------|-----------|------|-----|--------------|--------------|--------------|---------------------------------|---------------------------------|-------|-------|---------|---------|-------|------|-------|---------|---------|-----|--------|------|---------------|-------|------|---------------|
| Null | 0.6  |       |       |       |           |           |      |     |              |              |              |                                 |                                 |       |       |         |         |       |      |       |         |         | 2   | -24.0  | 52.3 | 0.0           | 0.2   | ✓    | 1.00          |
| R    | 1.9  |       |       |       |           |           |      |     |              |              |              |                                 |                                 | -0.1  |       |         |         |       |      |       |         |         | 3   | -23.5  | 53.8 | 1.5           | 0.1   |      |               |
| Any  | 1.4  |       |       |       |           |           | -4.9 |     |              |              |              |                                 |                                 |       |       |         |         |       |      |       |         |         | 3   | -23.6  | 53.9 | 1.6           | 0.1   |      |               |
| R    | 0.8  |       |       |       |           |           |      |     |              |              |              |                                 |                                 |       | 0.0   |         |         |       |      |       |         |         | 3   | -24.0  | 54.6 | 2.3           | 0.1   |      |               |
| C    | 0.7  |       |       |       |           |           |      |     | 0.1          | -0.1         |              | -0.5                            |                                 |       |       |         |         |       |      |       |         |         | 5   | -21.5  | 54.9 | 2.6           | 0.1   |      |               |
| A/R  | 2.5  |       |       |       |           |           | -4.5 |     |              |              |              |                                 |                                 | -0.1  |       |         |         |       |      |       |         |         | 4   | -23.2  | 55.7 | 3.3           | 0.0   |      |               |
| Any  | 2.3  |       |       |       |           |           | -5.3 | 0.0 |              |              |              |                                 |                                 |       |       |         |         |       |      |       |         |         | 4   | -23.3  | 55.8 | 3.5           | 0.0   |      |               |
| R    | 2.5  |       |       |       |           |           |      | 0.0 |              |              |              |                                 |                                 | -0.1  |       |         |         |       |      |       |         |         | 4   | -23.3  | 55.9 | 3.6           | 0.0   |      |               |
| R    | 1.9  |       |       |       |           |           |      |     |              |              |              |                                 |                                 | -0.1  | 0.0   |         |         |       |      |       |         |         | 4   | -23.5  | 56.3 | 4.0           | 0.0   |      |               |
| A/R  | 1.7  |       |       |       |           |           | -5.2 |     |              |              |              |                                 |                                 |       | 0.0   |         |         |       |      |       |         |         | 4   | -23.5  | 56.3 | 4.0           | 0.0   |      |               |
| A    | 1.3  |       |       |       |           |           | -4.9 |     |              |              |              |                                 |                                 |       |       |         |         |       | 0.0  |       |         |         | 4   | -23.6  | 56.4 | 4.1           | 0.0   |      |               |
| R    | 1.5  |       |       |       |           |           |      | 0.0 |              |              |              |                                 |                                 |       | 0.0   |         |         |       |      |       |         |         | 4   | -23.7  | 56.6 | 4.3           | 0.0   |      |               |
| C    | 1.7  |       |       |       |           |           | -5.8 |     | 0.1          | -0.1         |              | -0.5                            |                                 |       |       |         |         |       |      |       |         |         | 6   | -21.0  | 56.7 | 4.4           | 0.0   |      |               |
| C    | 0.7  |       |       |       |           |           |      |     | 0.1          |              | 0.3          |                                 | -0.2                            |       |       |         |         |       |      |       |         |         | 5   | -22.7  | 57.4 | 5.1           | 0.0   |      |               |
| A    | -0.4 |       |       |       |           |           | 13.3 |     |              |              |              |                                 |                                 | 0.2   |       |         |         |       |      |       | -2.2    |         | 5   | -22.8  | 57.5 | 5.1           | 0.0   |      |               |
| C    | 0.9  |       |       |       |           |           |      | 0.0 | 0.1          | -0.1         |              | -0.5                            |                                 |       |       |         |         |       |      |       |         |         | 6   | -21.5  | 57.7 | 5.4           | 0.0   |      |               |
| A    | -0.2 |       |       |       |           |           | 15.4 | 0.0 |              |              |              |                                 |                                 |       |       |         |         |       |      |       |         |         | 5   | -22.9  | 57.8 | 5.5           | 0.0   |      |               |
| A/R  | 3.2  |       |       |       |           |           | -4.7 | 0.0 |              |              |              |                                 |                                 | -0.1  |       |         |         |       | -0.3 |       |         |         | 5   | -23.0  | 57.9 | 5.5           | 0.0   |      |               |
| C    | -0.8 | 0.8   |       | 0.2   |           | -0.1      |      |     |              |              |              |                                 |                                 |       |       |         |         |       |      |       |         |         | 5   | -23.1  | 58.2 | 5.9           | 0.0   |      |               |
| R    | -0.3 |       |       |       |           |           |      | 0.0 |              |              |              |                                 |                                 | 0.2   |       | 0.0     |         |       |      |       |         |         | 5   | -23.1  | 58.2 | 5.9           | 0.0   |      |               |
| A/R  | 2.6  |       |       |       |           |           | -4.6 |     |              |              |              |                                 |                                 | -0.1  | 0.0   |         |         |       |      |       |         |         | 5   | -23.2  | 58.3 | 6.0           | 0.0   |      |               |
| A    | 2.0  |       |       |       |           |           | -5.1 | 0.0 |              |              |              |                                 |                                 |       |       |         |         |       | 0.0  |       |         |         | 5   | -23.2  | 58.4 | 6.1           | 0.0   |      |               |
| A/R  | 2.5  |       |       |       |           |           | -5.5 | 0.0 |              |              |              |                                 |                                 |       |       |         |         |       |      |       |         |         | 5   | -23.2  | 58.4 | 6.1           | 0.0   |      |               |
| R    | 2.5  |       |       |       |           |           |      | 0.0 |              |              |              |                                 |                                 | -0.1  | 0.0   |         |         |       |      |       |         |         | 5   | -23.3  | 58.6 | 6.3           | 0.0   |      |               |
| C    | 0.8  |       |       |       |           |           |      |     | 0.0          | -0.3         | 0.3          | -0.4                            | -0.2                            |       |       |         |         |       |      |       |         |         | 7   | -20.4  | 58.7 | 6.4           | 0.0   |      |               |
| A    | 0.8  |       |       |       |           |           | 0.8  |     |              |              |              |                                 |                                 |       | 0.1   |         |         |       |      |       |         | -1.4    | 5   | -23.4  | 58.7 | 6.4           | 0.0   |      |               |
| R    | 0.5  |       |       |       |           |           |      | 0.0 |              |              |              |                                 |                                 | 0.3   |       | 0.0     |         |       |      |       |         |         | 5   | -23.4  | 58.8 | 6.5           | 0.0   |      |               |
| A    | 1.8  |       |       |       |           |           | -8.7 |     |              |              |              |                                 |                                 |       |       |         |         |       | 0.0  | 0.2   |         |         | 5   | -23.6  | 59.1 | 6.7           | 0.0   |      |               |
| C    | 1.4  | -0.5  | -0.1  |       | 0.1       |           |      |     |              |              |              |                                 |                                 |       |       |         |         |       |      |       |         |         | 5   | -23.6  | 59.1 | 6.7           | 0.0   |      |               |
| C    | 1.8  |       |       |       |           |           | -6.4 |     | 0.0          |              | 0.3          |                                 | -0.2                            |       |       |         |         |       |      |       |         |         | 6   | -22.2  | 59.2 | 6.9           | 0.0   |      |               |
| C    | 1.6  |       |       |       |           |           |      | 0.0 | 0.0          |              | 0.3          |                                 | -0.2                            |       |       |         |         |       |      |       |         |         | 6   | -22.4  | 59.6 | 7.3           | 0.0   |      |               |
| C    | 1.9  |       |       |       |           |           | -5.9 | 0.0 | 0.0          | -0.1         |              | -0.5                            |                                 |       |       |         |         |       |      |       |         |         | 7   | -21.0  | 59.8 | 7.5           | 0.0   |      |               |
| C    | 0.1  | 0.8   |       | 0.2   |           | -0.1      | -5.7 |     |              |              |              |                                 |                                 |       |       |         |         |       |      |       |         |         | 6   | -22.6  | 60.0 | 7.7           | 0.0   |      |               |
| A    | 0.4  |       |       |       |           |           | 11.0 | 0.0 |              |              |              |                                 |                                 | 0.2   |       |         |         |       |      |       |         | -1.9    | 6   | -22.6  | 60.1 | 7.8           | 0.0   |      |               |

| Hyp. | Int. | $C_S$ | $H_F$ | $H_M$ | $C_S:H_F$ | $C_S:H_M$ | $R$   | $E$ | $\Delta C_S$ | $\Delta H_F$ | $\Delta H_M$ | $\Delta C_S:$<br>$\Delta H_F$ | $\Delta C_S:$<br>$\Delta H_M$ | $B_F$ | $B_M$ | $B_F:E$ | $B_M:E$ | $R:E$ | $G$  | $R:G$ | $R:B_F$ | $R:B_M$ | $k$ | logLik | AICc  | $\Delta AICc$ | $w_i$ | Ret. | Adj.<br>$w_i$ |  |
|------|------|-------|-------|-------|-----------|-----------|-------|-----|--------------|--------------|--------------|-------------------------------|-------------------------------|-------|-------|---------|---------|-------|------|-------|---------|---------|-----|--------|-------|---------------|-------|------|---------------|--|
| A    | -0.7 |       |       |       |           |           | 15.6  |     |              |              |              |                               |                               | 0.3   | -0.1  |         |         |       |      |       |         |         | 6   | -22.7  | 60.1  | 7.8           | 0.0   |      |               |  |
| A    | -1.2 |       |       |       |           |           | 19.1  | 0.0 |              |              |              |                               |                               |       |       |         |         |       | -0.4 | 0.0   |         |         |     | 6      | -22.8 | 60.4          | 8.1   | 0.0  |               |  |
| C    | 2.4  |       |       |       |           |           | -8.8  |     | -0.2         | -0.3         | 0.4          | -0.4                          | -0.2                          |       |       |         |         |       |      |       |         |         |     | 8      | -19.6 | 60.4          | 8.1   | 0.0  |               |  |
| C    | 2.8  | -0.7  | -0.1  |       | 0.1       |           |       | 0.0 |              |              |              |                               |                               |       |       |         |         |       |      |       |         |         |     | 6      | -22.8 | 60.4          | 8.1   | 0.0  |               |  |
| A    | 1.1  |       |       |       |           |           | 10.5  | 0.0 |              |              |              |                               |                               | -0.1  |       |         |         |       | -0.2 |       |         |         |     | 6      | -22.8 | 60.4          | 8.1   | 0.0  |               |  |
| C    | 0.0  | 0.8   |       | 0.2   |           | -0.1      |       | 0.0 |              |              |              |                               |                               |       |       |         |         |       |      |       |         |         |     | 6      | -22.9 | 60.5          | 8.2   | 0.0  |               |  |
| R    | 1.1  |       |       |       |           |           | -4.1  | 0.0 |              |              |              |                               |                               | 0.1   |       | 0.0     |         |       |      |       |         |         |     | 6      | -22.9 | 60.6          | 8.3   | 0.0  |               |  |
| A    | -0.1 |       |       |       |           |           | 15.1  | 0.0 |              |              |              |                               |                               |       |       |         |         |       | -0.3 |       |         |         |     | 6      | -22.9 | 60.6          | 8.3   | 0.0  |               |  |
| A    | 1.5  |       |       |       |           |           | 4.4   | NA  |              |              |              |                               |                               | -0.2  | 0.3   |         |         |       |      |       |         | -2.0    |     | 6      | -23.0 | 60.7          | 8.4   | 0.0  |               |  |
| R    | 1.5  |       |       |       |           |           | -5.6  | 0.0 |              |              |              |                               |                               |       | 0.3   |         | 0.0     |       |      |       |         |         |     | 6      | -23.0 | 60.7          | 8.4   | 0.0  |               |  |
| A/R  | 3.3  |       |       |       |           |           | -4.8  | 0.0 |              |              |              |                               |                               | -0.1  | 0.0   |         |         |       |      |       |         |         |     | 6      | -23.0 | 60.7          | 8.4   | 0.0  |               |  |
| R    | 1.5  |       |       |       |           |           |       | 0.0 |              |              |              |                               |                               | -0.1  | 0.3   |         | 0.0     |       |      |       |         |         |     | 6      | -23.0 | 60.8          | 8.5   | 0.0  |               |  |
| C    | 3.5  |       |       |       |           |           | -8.1  | 0.0 | -0.2         |              | 0.4          |                               | -0.3                          |       |       |         |         |       |      |       |         |         |     | 7      | -21.6 | 61.1          | 8.7   | 0.0  |               |  |
| R    | -0.3 |       |       |       |           |           |       | 0.0 |              |              |              |                               |                               | 0.2   | 0.0   | 0.0     |         |       |      |       |         |         |     | 6      | -23.1 | 61.1          | 8.8   | 0.0  |               |  |
| A    | 1.8  |       |       |       |           |           | -0.9  | 0.0 |              |              |              |                               |                               |       | 0.1   |         |         |       |      |       |         | -1.0    |     | 6      | -23.2 | 61.1          | 8.8   | 0.0  |               |  |
| A    | 2.7  |       |       |       |           |           | -10.0 | 0.0 |              |              |              |                               |                               |       |       |         |         |       | 0.0  | 0.2   |         |         |     | 6      | -23.2 | 61.2          | 8.9   | 0.0  |               |  |
| C    | 2.0  | -0.4  | -0.1  |       | 0.1       |           | -3.8  |     |              |              |              |                               |                               |       |       |         |         |       |      |       |         |         |     | 6      | -23.3 | 61.5          | 9.2   | 0.0  |               |  |
| C    | 1.2  |       |       |       |           |           |       | 0.0 | 0.0          | -0.3         | 0.4          | -0.4                          | -0.2                          |       |       |         |         |       |      |       |         |         |     | 8      | -20.4 | 61.9          | 9.6   | 0.0  |               |  |
| C    | 0.9  | 0.8   |       | 0.2   |           | -0.1      | -5.9  | 0.0 |              |              |              |                               |                               |       |       |         |         |       |      |       |         |         |     | 7      | -22.3 | 62.5          | 10.2  | 0.0  |               |  |
| C    | 0.7  | -0.1  | -0.3  | 0.2   | 0.1       | -0.1      |       |     |              |              |              |                               |                               |       |       |         |         |       |      |       |         |         |     | 7      | -22.4 | 62.6          | 10.3  | 0.0  |               |  |
| A    | -1.2 |       |       |       |           |           | 22.8  | 0.0 |              |              |              |                               |                               | 0.2   |       |         |         |       | -0.2 |       |         | -1.8    |     | 7      | -22.5 | 62.9          | 10.6  | 0.0  |               |  |
| A    | -1.0 |       |       |       |           |           | 19.8  |     |              |              |              |                               |                               | 0.2   | 0.2   |         |         |       |      |       | -2.2    | -1.5    |     | 7      | -22.5 | 62.9          | 10.6  | 0.0  |               |  |
| A    | 0.2  |       |       |       |           |           | 13.2  | 0.0 |              |              |              |                               |                               | 0.3   | -0.1  |         |         |       |      |       | -2.2    |         |     | 7      | -22.6 | 63.0          | 10.7  | 0.0  |               |  |
| R    | 2.2  |       |       |       |           |           | -4.8  | 0.0 |              |              |              |                               |                               | -0.1  | 0.3   |         | 0.0     |       |      |       |         |         |     | 7      | -22.6 | 63.2          | 10.9  | 0.0  |               |  |
| C    | 3.2  | -0.7  | -0.1  |       | 0.1       |           | -3.1  | 0.0 |              |              |              |                               |                               |       |       |         |         |       |      |       |         |         |     | 7      | -22.7 | 63.2          | 10.9  | 0.0  |               |  |
| A    | -0.3 |       |       |       |           |           | 12.4  | 0.0 |              |              |              |                               |                               |       |       |         |         |       | -0.4 | 0.0   | 0.4     |         |     | 7      | -22.7 | 63.3          | 11.0  | 0.0  |               |  |
| A    | 2.3  |       |       |       |           |           | 2.9   | 0.0 |              |              |              |                               |                               | -0.1  | 0.2   |         |         |       |      |       |         | -1.7    |     | 7      | -22.8 | 63.5          | 11.1  | 0.0  |               |  |
| A    | 1.1  |       |       |       |           |           | 10.5  | 0.0 |              |              |              |                               |                               | -0.1  | 0.0   |         |         |       | -0.2 |       |         |         |     | 7      | -22.8 | 63.5          | 11.2  | 0.0  |               |  |
| A    | -0.7 |       |       |       |           |           | 19.3  | 0.0 |              |              |              |                               |                               |       | 0.1   |         |         |       | -0.3 |       |         | -1.0    |     | 7      | -22.9 | 63.6          | 11.3  | 0.0  |               |  |
| R    | 1.1  |       |       |       |           |           | -4.2  | 0.0 |              |              |              |                               |                               | 0.2   | 0.0   | 0.0     |         |       |      |       |         |         |     | 7      | -22.9 | 63.6          | 11.3  | 0.0  |               |  |
| C    | 3.2  |       |       |       |           |           | -9.0  | 0.0 | -0.2         | -0.3         | 0.5          | -0.4                          | -0.2                          |       |       |         |         |       |      |       |         |         |     | 9      | -19.5 | 63.7          | 11.4  | 0.0  |               |  |
| R    | 0.4  |       |       |       |           |           |       | 0.0 |              |              |              |                               |                               | 0.0   | 0.3   | 0.0     | 0.0     |       |      |       |         |         |     | 7      | -23.0 | 63.8          | 11.5  | 0.0  |               |  |
| C    | 1.9  | -0.3  | -0.2  | 0.2   | 0.2       | -0.1      |       | 0.0 |              |              |              |                               |                               |       |       |         |         |       |      |       | -2.0    | -1.3    |     | 8      | -21.9 | 64.8          | 12.5  | 0.0  |               |  |
| C    | 1.3  | 0.1   | -0.3  | 0.3   | 0.1       | -0.1      | -4.9  |     |              |              |              |                               |                               |       |       |         |         |       |      |       |         |         |     | 8      | -22.1 | 65.3          | 13.0  | 0.0  |               |  |
| A    | -0.3 |       |       |       |           |           | 17.3  | 0.0 |              |              |              |                               |                               | 0.2   | 0.1   |         |         |       |      |       |         |         |     | 8      | -22.5 | 66.1          | 13.8  | 0.0  |               |  |
| A    | -1.2 |       |       |       |           |           | 22.9  | 0.0 |              |              |              |                               |                               | 0.3   | 0.0   |         |         |       | -0.2 |       | -2.0    | -1.3    |     | 8      | -22.5 | 66.1          | 13.8  | 0.0  |               |  |
| R    | 2.2  |       |       |       |           |           | -4.8  | 0.0 |              |              |              |                               |                               | -0.1  | 0.3   | 0.0     | 0.0     |       |      |       |         |         |     | 8      | -22.6 | 66.4          | 14.1  | 0.0  |               |  |
| A    | 0.5  |       |       |       |           |           | 15.5  | 0.0 |              |              |              |                               |                               | -0.1  | 0.2   |         |         |       | -0.2 |       |         | -1.5    |     | 8      | -22.7 | 66.5          | 14.2  | 0.0  |               |  |
| C    | 2.3  | -0.2  | -0.2  | 0.2   | 0.2       | -0.1      | -4.2  | 0.0 |              |              |              |                               |                               |       |       |         |         |       |      |       |         |         |     | 9      | -21.6 | 67.9          | 15.6  | 0.0  |               |  |
| A    | -1.5 |       |       |       |           |           | 25.9  | 0.0 |              |              |              |                               |                               | 0.2   | 0.1   |         |         |       | -0.2 |       | -1.9    | -1.2    |     | 9      | -22.4 | 69.5          | 17.2  | 0.0  |               |  |

54 Hyp. = Hypothesis: A = Adaptive Forced Dispersal; C = Coercion of Cooperation; R = Reproductive Competition; Any = Any of the three hypotheses; Null = null model. Columns 2 to 23 show

55 parameter effect sizes from GLMMs on the logit scale: Int. = Intercept;  $C_S$  = number of emergent pups per female that contributed to the previous litter;  $H_F$  = number of female helpers in the

56 previous breeding attempt;  $H_M$  = number of male helpers in the previous breeding attempt;  $R$  = mean group relatedness;  $E$  = mean rainfall in previous 6 months;  $\Delta C_S$  = change in the number  
57 of emergent pups per female that contributed to the litter in the breeding attempts before and of the eviction;  $\Delta H_F$  = change in the number of female helpers in the breeding attempts before  
58 and of the eviction;  $\Delta H_M$  = change in the number of male helpers in the breeding attempts before and of the eviction;  $B_F$  = number of breeding females;  $B_M$  = number of breeding males;  $G$  =  
59 group size;  $:$  = interaction.  $k$  = number of estimated parameters including a random intercept for group ID; logLik = log-likelihood; AICc = corrected Akaike's information criterion;  $\Delta AICc$  =  
60 change in AICc value from the best performing model;  $w_i$  = Akaike's model weight; Ret. = tick indicates that the model was retained after applying the nesting rule of Richards et al. (2011);  
61 Adj.  $w_i$  = adjusted Akaike's model weight for the retained models. Blank cells indicate that the term was absent from that model.

62 ESM Table 6: ‘Temporary evictions’. Model performance in predicting the probability that evictees are allowed to return to their group following an eviction  
 63 event ( $N=22$  eviction events in 6 groups). Analysis using the helping effort ( $C_E$ ) measure of helping performance under the coercion of cooperation  
 64 hypothesis. Models above the line comprise the top model set where  $\Delta AICc \leq 6$ .

| Hyp. | Int. | $C_{EF}$ | $H_F$ | $\frac{C_{EF}^2}{H_F}$ | $C_{EM}$ | $H_M$ | $\frac{C_{EM}^2}{H_M}$ | $R$  | $E$  | $\Delta C_{EF}$ | $\Delta H_F$ | $\frac{\Delta C_{EF}^2}{\Delta H_F}$ | $\Delta C_{EM}$ | $\Delta H_M$ | $\frac{\Delta C_{EM}^2}{\Delta H_M}$ | $B_F$ | $B_M$ | $B_F:E$ | $B_M:E$ | $R:E$ | $G$ | $R:G$ | $R:B_F$ | $R:B_M$ | $k$   | logLik | AICc | $\Delta AICc$ | $w_i$ | Ret. | Adj. $w_i$ |
|------|------|----------|-------|------------------------|----------|-------|------------------------|------|------|-----------------|--------------|--------------------------------------|-----------------|--------------|--------------------------------------|-------|-------|---------|---------|-------|-----|-------|---------|---------|-------|--------|------|---------------|-------|------|------------|
| Null | 0.0  |          |       |                        |          |       |                        |      |      |                 |              |                                      |                 |              |                                      |       |       |         |         |       |     |       |         | 2       | -15.2 | 35.1   | 0.0  | 0.3           | ✓     | 1.0  |            |
| R    | 2.0  |          |       |                        |          |       |                        |      |      |                 |              |                                      |                 |              | -0.2                                 |       |       |         |         |       |     |       |         | 3       | -14.6 | 36.5   | 1.4  | 0.1           |       |      |            |
| R    | 0.9  |          |       |                        |          |       |                        |      |      |                 |              |                                      |                 |              | -0.2                                 |       |       |         |         |       |     |       |         | 3       | -14.7 | 36.8   | 1.7  | 0.1           |       |      |            |
| Any  | -0.2 |          |       |                        |          |       |                        | 0.9  |      |                 |              |                                      |                 |              |                                      |       |       |         |         |       |     |       |         | 3       | -15.2 | 37.8   | 2.7  | 0.1           |       |      |            |
| C    | -2.8 | 32.0     | 0.3   | -4.0                   |          |       |                        |      |      |                 |              |                                      |                 |              |                                      |       |       |         |         |       |     |       |         | 5       | -12.1 | 38.0   | 2.9  | 0.1           |       |      |            |
| R    | 3.1  |          |       |                        |          |       |                        |      |      |                 |              |                                      |                 |              | -0.2                                 | -0.2  |       |         |         |       |     |       |         | 4       | -14.0 | 38.4   | 3.2  | 0.0           |       |      |            |
| R    | 2.9  |          |       |                        |          |       |                        |      | 0.0  |                 |              |                                      |                 |              |                                      | -0.1  |       |         |         |       |     |       |         | 4       | -14.4 | 39.1   | 4.0  | 0.0           |       |      |            |
| R    | 3.1  |          |       |                        |          |       |                        |      | 0.0  |                 |              |                                      |                 |              | -0.2                                 |       |       |         |         |       |     |       |         | 4       | -14.4 | 39.2   | 4.0  | 0.0           |       |      |            |
| A/R  | 1.8  |          |       |                        |          |       |                        | 1.6  |      |                 |              |                                      |                 |              | -0.2                                 |       |       |         |         |       |     |       |         | 4       | -14.5 | 39.5   | 4.3  | 0.0           |       |      |            |
| Any  | 2.4  |          |       |                        |          |       |                        | 0.3  | 0.0  |                 |              |                                      |                 |              |                                      |       |       |         |         |       |     |       |         | 4       | -14.7 | 39.8   | 4.7  | 0.0           |       |      |            |
| A/R  | 0.8  |          |       |                        |          |       |                        | 0.3  |      |                 |              |                                      |                 |              | -0.2                                 |       |       |         |         |       |     |       |         | 4       | -14.7 | 39.8   | 4.7  | 0.0           |       |      |            |
| A    | 0.9  |          |       |                        |          |       |                        | 0.7  |      |                 |              |                                      |                 |              |                                      |       |       |         |         |       | 0.0 |       |         | 4       | -15.1 | 40.5   | 5.3  | 0.0           |       |      |            |
| C    | 0.3  |          |       |                        |          |       |                        |      |      | 3.5             | -0.2         | -1.0                                 |                 |              |                                      |       |       |         |         |       |     |       |         | 5       | -13.4 | 40.5   | 5.4  | 0.0           |       |      |            |
| A    | -6.6 |          |       |                        |          |       |                        | 67.4 | 0.1  |                 |              |                                      |                 |              |                                      |       |       |         |         | -1.0  |     |       |         | 5       | -13.7 | 41.2   | 6.1  | 0.0           |       |      |            |
| A    | -3.1 |          |       |                        |          |       |                        | 32.9 |      |                 |              |                                      |                 |              | 0.4                                  |       |       |         |         |       |     |       | -4.1    | 5       | -13.9 | 41.5   | 6.3  | 0.0           |       |      |            |
| C    | -3.9 | 33.3     | 0.4   | -4.2                   |          |       |                        | 4.7  |      |                 |              |                                      |                 |              |                                      |       |       |         |         |       |     |       |         | 6       | -12.0 | 41.5   | 6.4  | 0.0           |       |      |            |
| R    | 3.8  |          |       |                        |          |       |                        |      | 0.0  |                 |              |                                      |                 |              | -0.2                                 | -0.2  |       |         |         |       |     |       |         | 5       | -13.9 | 41.6   | 6.5  | 0.0           |       |      |            |
| R    | 23.3 |          |       |                        |          |       |                        |      | -0.3 |                 |              |                                      |                 |              | -2.5                                 |       | 0.0   |         |         |       |     |       |         | 5       | -14.0 | 41.7   | 6.6  | 0.0           |       |      |            |
| A/R  | 3.0  |          |       |                        |          |       |                        | 0.9  |      |                 |              |                                      |                 |              | -0.2                                 | -0.2  |       |         |         |       |     |       |         | 5       | -14.0 | 41.8   | 6.6  | 0.0           |       |      |            |
| C    | -2.0 | 31.4     | 0.4   | -4.0                   |          |       |                        |      | 0.0  |                 |              |                                      |                 |              |                                      |       |       |         |         |       |     |       |         | 6       | -12.1 | 41.8   | 6.7  | 0.0           |       |      |            |
| R    | 3.4  |          |       |                        |          |       |                        |      | 0.0  |                 |              |                                      |                 |              | -0.2                                 |       | 0.0   |         |         |       |     |       |         | 5       | -14.4 | 42.5   | 7.4  | 0.0           |       |      |            |
| A/R  | 3.0  |          |       |                        |          |       |                        | -0.2 | 0.0  |                 |              |                                      |                 |              | -0.1                                 |       |       |         |         |       |     |       |         | 5       | -14.4 | 42.5   | 7.4  | 0.0           |       |      |            |
| A/R  | 2.9  |          |       |                        |          |       |                        | 1.0  | 0.0  |                 |              |                                      |                 |              | -0.2                                 |       |       |         |         |       |     |       |         | 5       | -14.4 | 42.5   | 7.4  | 0.0           |       |      |            |
| C    | 3.7  |          |       |                        |          |       |                        | -0.1 | 3.5  | 0.0             | -1.0         |                                      |                 |              |                                      |       |       |         |         |       |     |       |         | 6       | -12.7 | 42.9   | 7.8  | 0.0           |       |      |            |
| A    | 1.8  |          |       |                        |          |       |                        | -5.9 |      |                 |              |                                      |                 |              | -0.4                                 |       |       |         |         |       |     |       | 1.5     | 5       | -14.7 | 43.1   | 8.0  | 0.0           |       |      |            |
| A    | 2.4  |          |       |                        |          |       |                        | 0.3  | 0.0  |                 |              |                                      |                 |              |                                      |       |       |         |         |       | 0.0 |       |         | 5       | -14.7 | 43.2   | 8.1  | 0.0           |       |      |            |
| A    | -3.6 |          |       |                        |          |       |                        | 46.5 |      |                 |              |                                      |                 |              | 0.7                                  | -0.3  |       |         |         |       |     | -5.9  |         | 6       | -12.9 | 43.3   | 8.2  | 0.0           |       |      |            |
| C    | 1.1  |          |       |                        | -0.3     | -0.1  | 0.1                    |      |      |                 |              |                                      |                 |              |                                      |       |       |         |         |       |     |       |         | 5       | -14.8 | 43.4   | 8.2  | 0.0           |       |      |            |
| C    | -0.1 |          |       |                        |          |       |                        |      |      |                 |              | -0.3                                 | 0.1             | 0.0          |                                      |       |       |         |         |       |     |       |         | 5       | -15.0 | 43.8   | 8.6  | 0.0           |       |      |            |
| A    | 0.4  |          |       |                        |          |       |                        | 4.3  |      |                 |              |                                      |                 |              |                                      |       |       |         |         |       | 0.0 | -0.2  |         | 5       | -15.0 | 43.8   | 8.7  | 0.0           |       |      |            |
| A    | -7.3 |          |       |                        |          |       |                        | 79.6 | 0.1  |                 |              |                                      |                 |              | -0.2                                 |       |       |         |         | -1.2  |     |       |         | 6       | -13.1 | 43.9   | 8.8  | 0.0           |       |      |            |
| C    | 0.9  |          |       |                        |          |       |                        | -2.9 |      | 3.9             | -0.2         | -1.2                                 |                 |              |                                      |       |       |         |         |       |     |       |         | 6       | -13.3 | 44.2   | 9.1  | 0.0           |       |      |            |
| A    | -5.4 |          |       |                        |          |       |                        | 61.8 | 0.1  |                 |              |                                      |                 |              | -0.1                                 |       |       |         |         | -0.9  |     |       |         | 6       | -13.5 | 44.7   | 9.5  | 0.0           |       |      |            |
| A    | -2.8 |          |       |                        |          |       |                        | 44.3 | 0.0  |                 |              |                                      |                 |              | 0.8                                  |       |       |         |         |       |     | -6.0  |         | 6       | -13.6 | 44.7   | 9.6  | 0.0           |       |      |            |
| R    | 19.0 |          |       |                        |          |       |                        | -0.3 |      |                 |              |                                      |                 |              | -2.0                                 | -0.1  | 0.0   |         |         |       |     |       |         | 6       | -13.7 | 45.0   | 9.9  | 0.0           |       |      |            |
| A    | -6.6 |          |       |                        |          |       |                        | 67.6 | 0.1  |                 |              |                                      |                 |              |                                      |       |       |         |         | -1.0  | 0.0 |       |         | 6       | -13.7 | 45.0   | 9.9  | 0.0           |       |      |            |
| R    | 24.5 |          |       |                        |          |       |                        | 2.7  | -0.4 |                 |              |                                      |                 |              | -2.8                                 |       | 0.0   |         |         |       |     |       |         | 6       | -13.9 | 45.4   | 10.3 | 0.0           |       |      |            |
| C    | 4.3  |          |       |                        |          |       |                        | -0.1 |      |                 |              | -0.7                                 | 0.3             | 0.5          |                                      |       |       |         |         |       |     |       |         | 6       | -13.9 | 45.5   | 10.3 | 0.0           |       |      |            |
| A/R  | 3.7  |          |       |                        |          |       |                        | 0.5  | 0.0  |                 |              |                                      |                 |              | -0.2                                 | -0.2  |       |         |         |       |     |       |         | 6       | -13.9 | 45.5   | 10.3 | 0.0           |       |      |            |
| R    | 3.5  |          |       |                        |          |       |                        |      | 0.0  |                 |              |                                      |                 |              | -0.2                                 | -0.1  |       | 0.0     |         |       |     |       |         | 6       | -13.9 | 45.5   | 10.3 | 0.0           |       |      |            |

| Hyp. | Int. | $C_{EF}$ | $H_F$ | $C_{EF}^2$<br>$H_F$ | $C_{EM}$ | $H_M$ | $C_{EM}^2$<br>$H_M$ | $R$  | $E$  | $\Delta C_{EF}$ | $\Delta H_F$ | $\Delta C_{EF}^2$<br>$\Delta H_F$ | $\Delta C_{EM}$ | $\Delta H_M$ | $\Delta C_{EM}^2$<br>$\Delta H_M$ | $B_F$ | $B_M$ | $B_F:E$ | $B_M:E$ | $R:E$ | $G$  | $R:G$ | $R:B_F$ | $R:B_M$ | k     | logLik | AICc | $\Delta AICc$ | $w_i$ | Ret. | Adj.<br>$w_i$ |
|------|------|----------|-------|---------------------|----------|-------|---------------------|------|------|-----------------|--------------|-----------------------------------|-----------------|--------------|-----------------------------------|-------|-------|---------|---------|-------|------|-------|---------|---------|-------|--------|------|---------------|-------|------|---------------|
| A    | 3.1  |          |       |                     |          |       |                     | -0.1 |      |                 |              |                                   |                 |              |                                   | -0.2  | -0.2  |         |         |       |      |       |         | 0.2     | 6     | -14.0  | 45.6 | 10.5          | 0.0   |      |               |
| C    | -3.1 | 32.9     | 0.4   | -4.1                |          |       |                     | 4.6  | 0.0  |                 |              |                                   |                 |              |                                   |       |       |         |         |       |      |       |         |         | 7     | -11.9  | 45.9 | 10.7          | 0.0   |      |               |
| C    | 3.5  |          |       |                     | -0.3     | -0.1  | 0.1                 |      | 0.0  |                 |              |                                   |                 |              |                                   |       |       |         |         |       |      |       |         |         | 6     | -14.3  | 46.1 | 11.0          | 0.0   |      |               |
| A    | 3.4  |          |       |                     |          |       |                     | -3.4 | 0.0  |                 |              |                                   |                 |              |                                   |       | -0.3  |         |         |       |      |       |         | 0.8     | 6     | -14.4  | 46.3 | 11.2          | 0.0   |      |               |
| R    | 3.4  |          |       |                     |          |       |                     | -0.1 | 0.0  |                 |              |                                   |                 |              |                                   | -0.2  |       | 0.0     |         |       |      |       |         |         | 6     | -14.4  | 46.3 | 11.2          | 0.0   |      |               |
| A    | 1.5  |          |       |                     |          |       |                     | 7.9  | 0.0  |                 |              |                                   |                 |              |                                   |       |       |         |         |       | 0.1  | -0.4  |         |         | 6     | -14.7  | 47.0 | 11.8          | 0.0   |      |               |
| C    | 0.8  |          |       |                     | -0.4     | -0.2  | 0.1                 | 2.5  |      |                 |              |                                   |                 |              |                                   |       |       |         |         |       |      |       |         |         | 6     | -14.7  | 47.1 | 11.9          | 0.0   |      |               |
| C    | 4.2  |          |       |                     |          |       |                     | -3.1 | -0.1 | 4.0             | -0.1         | -1.3                              |                 |              |                                   |       |       |         |         |       |      |       |         |         | 7     | -12.6  | 47.1 | 12.0          | 0.0   |      |               |
| A    | -2.7 |          |       |                     |          |       |                     | 46.6 | 0.0  |                 |              |                                   |                 |              |                                   | 0.8   | -0.3  |         |         |       |      |       | -6.1    |         | 7     | -12.7  | 47.5 | 12.3          | 0.0   |      |               |
| C    | -0.2 |          |       |                     |          |       |                     | 0.8  |      |                 |              |                                   | -0.3            | 0.1          | 0.0                               |       |       |         |         |       |      |       |         |         | 6     | -15.0  | 47.6 | 12.5          | 0.0   |      |               |
| A    | -3.3 |          |       |                     |          |       |                     | 44.5 |      |                 |              |                                   |                 |              |                                   | 0.8   | -0.5  |         |         |       |      |       | -6.4    | 1.5     | 7     | -12.8  | 47.6 | 12.5          | 0.0   |      |               |
| A    | -5.9 |          |       |                     |          |       |                     | 73.0 | 0.1  |                 |              |                                   |                 |              |                                   | -0.2  | -0.2  |         |         |       | -1.1 |       |         |         | 7     | -12.9  | 47.8 | 12.7          | 0.0   |      |               |
| A    | -6.5 |          |       |                     |          |       |                     | 70.8 | 0.1  |                 |              |                                   |                 |              |                                   |       | -0.6  |         |         |       | -1.3 |       |         |         | 7     | -13.0  | 48.0 | 12.9          | 0.0   |      |               |
| A    | -6.6 |          |       |                     |          |       |                     | 72.0 | 0.1  |                 |              |                                   |                 |              |                                   | 0.5   |       |         |         |       | -0.7 |       | -3.8    |         | 7     | -13.3  | 48.5 | 13.4          | 0.0   |      |               |
| A    | -7.2 |          |       |                     |          |       |                     | 70.2 | 0.2  |                 |              |                                   |                 |              |                                   |       |       |         |         | -1.5  | -0.2 | 1.2   |         |         | 7     | -13.5  | 49.0 | 13.9          | 0.0   |      |               |
| R    | 19.9 |          |       |                     |          |       |                     | 1.9  | -0.3 |                 |              |                                   |                 |              |                                   | -2.2  | -0.1  | 0.0     |         |       |      |       |         |         | 7     | -13.7  | 49.3 | 14.2          | 0.0   |      |               |
| C    | -1.5 | 65.7     | 0.9   | -8.2                | -4.7     | -0.4  | 0.3                 |      |      |                 |              |                                   |                 |              |                                   |       |       |         |         |       |      |       |         |         | 8     | -11.1  | 49.3 | 14.2          | 0.0   |      |               |
| R    | 21.0 |          |       |                     |          |       |                     |      | -0.3 |                 |              |                                   |                 |              |                                   | -2.1  | -0.3  | 0.0     | 0.0     |       |      |       |         |         | 7     | -13.7  | 49.4 | 14.2          | 0.0   |      |               |
| C    | 4.2  |          |       |                     |          |       |                     | 0.2  | -0.1 |                 |              |                                   | -0.7            | 0.3          | 0.5                               |       |       |         |         |       |      |       |         |         | 7     | -13.9  | 49.9 | 14.7          | 0.0   |      |               |
| R    | 3.5  |          |       |                     |          |       |                     | 0.4  | 0.0  |                 |              |                                   |                 |              |                                   | -0.2  | -0.1  |         | 0.0     |       |      |       |         |         | 7     | -13.9  | 49.9 | 14.7          | 0.0   |      |               |
| A    | 3.6  |          |       |                     |          |       |                     | 0.6  | 0.0  |                 |              |                                   |                 |              |                                   | -0.2  | -0.2  |         |         |       |      |       |         |         | 7     | -13.9  | 49.9 | 14.7          | 0.0   |      |               |
| C    | 3.3  |          |       |                     | -0.4     | -0.1  | 0.1                 | 2.0  | 0.0  |                 |              |                                   |                 |              |                                   |       |       |         |         |       |      |       |         | 0.0     | 7     | -14.2  | 50.5 | 15.3          | 0.0   |      |               |
| A    | -6.5 |          |       |                     |          |       |                     | 75.3 | 0.1  |                 |              |                                   |                 |              |                                   | 0.5   | -0.3  |         |         |       | -0.7 |       | -4.2    |         | 8     | -12.4  | 51.9 | 16.8          | 0.0   |      |               |
| A    | -2.6 |          |       |                     |          |       |                     | 44.9 | 0.0  |                 |              |                                   |                 |              |                                   | 0.8   | -0.4  |         |         |       |      | -6.3  | 1.0     | 8       | -12.7 | 52.5   | 17.4 | 0.0           |       |      |               |
| A    | -5.5 |          |       |                     |          |       |                     | 67.7 | 0.1  |                 |              |                                   |                 |              |                                   | -0.1  | -0.5  |         |         |       | -1.1 |       |         | 1.7     | 8     | -12.9  | 52.8 | 17.7          | 0.0   |      |               |
| C    | -4.1 | 103.6    | 1.6   | -13.0               | -7.7     | -0.8  | 0.5                 | 10.2 |      |                 |              |                                   |                 |              |                                   |       |       |         |         |       |      |       |         |         | 9     | -10.7  | 54.3 | 19.2          | 0.0   |      |               |
| R    | 23.0 |          |       |                     |          |       |                     | 2.3  | -0.3 |                 |              |                                   |                 |              |                                   | -2.4  | -0.4  | 0.0     | 0.0     |       |      |       |         |         | 8     | -13.6  | 54.4 | 19.2          | 0.0   |      |               |
| C    | -3.8 | 88.7     | 1.3   | -11.1               | -6.7     | -0.7  | 0.4                 |      | 0.0  |                 |              |                                   |                 |              |                                   |       |       |         |         |       |      |       |         |         | 9     | -11.0  | 54.9 | 19.8          | 0.0   |      |               |
| A    | -6.4 |          |       |                     |          |       |                     | 72.4 | 0.1  |                 |              |                                   |                 |              |                                   | 0.5   | -0.5  |         |         |       | -0.7 |       | -4.4    | 1.9     | 9     | -12.4  | 57.8 | 22.6          | 0.0   |      |               |
| C    | -7.7 | 135.9    | 2.1   | -17.1               | -10.5    | -1.1  | 0.7                 | 11.0 | 0.1  |                 |              |                                   |                 |              |                                   |       |       |         |         |       |      |       |         |         | 10    | -10.4  | 60.8 | 25.7          | 0.0   |      |               |

65 Hyp. = Hypothesis: A = Adaptive Forced Dispersal; C = Coercion of Cooperation; R = Reproductive Competition; Any = Any of the three hypotheses; Null = null model. Columns 2 to 25 show

66 parameter effect sizes from GLMMs on the logit scale: Int. = Intercept;  $C_{EF}$  = number of female helpers left per day of babysitting of the previous litter;  $H_F$  = number of female helpers in the

67 previous breeding attempt;  $C_{EM}$  = number of male helpers left per day of babysitting of the previous litter;  $H_M$  = number of male helpers in the previous breeding attempt;  $R$  = mean group

68 relatedness;  $E$  = mean rainfall in previous 6 months;  $\Delta C_{EF}$  = change in the number of female helpers left per day of babysitting in the breeding attempts before and of the eviction;  $\Delta H_F$  =

69 change in the number of female helpers in the breeding attempts before and of the eviction;  $\Delta C_{EM}$  = change in the number of male helpers left per day of babysitting in the breeding attempts

70 before and of the eviction;  $\Delta H_M$  = change in the number of male helpers in the breeding attempts before and of the eviction;  $B_F$  = number of breeding females;  $B_M$  = number of breeding

71 males;  $G$  = group size; : = interaction. k = number of estimated parameters including a random intercept for group ID; logLik = log-likelihood; AICc = corrected Akaike's information criterion;

72  $\Delta\text{AICc}$  = change in AICc value from the best performing model;  $w_i$  = Akaike's model weight; Ret. = tick indicates that the model was retained after applying the nesting rule of Richards et al.

73 (2011); Adj.  $w_i$  = adjusted Akaike's model weight for the retained models. Blank cells indicate that the term was absent from that model.
